# Supplementary material
Source: HighWire-hosted journal article supplement (https://ez-admanager.com/highwire/filestream/134673/field_highwire_adjunct_files/0/johansson_1538.pdf)
Supplement: johansson_1538.pdf [file johansson_1538.pdf]

# 중년기의 성격 그리고 알츠하이머병의 위험과 스트레스

## 38년의 추적관찰

### Midlife personality and risk of Alzheimer disease and distress

A 38-year follow-up

Lena Johansson, PhD  
Xinxin Guo, MD, PhD  
Paul R. Duberstein, PhD  
Tore Hällström, MD,  
PhD  
Margda Waern, MD,  
PhD  
Svante Östling, MD, PhD  
Ingmar Skoog, MD, PhD

**목적:** 38년간 추적관찰한 여성 표본에서 중년의 신경증적 경향(neuroticism)과 외향성(extraversion), 그리고 노년의 치매 발생과 오래 지속되는 스트레스(distress)와의 관계를 확인하고자 하였다.

**방법:** 연령 38세에서 54세인 800명 여성의 인구기반 표본으로, 1968년에 검진하고 이어 1974, 1980, 1992, 2000 그리고 2005년에 검진하였다. 신경증적 경향과 외향성은 Eysenck Personality Inventory를 이용하여 기준시점에서 평가하였다. 스트레스는 각 연구 시점에서 표준화된 설문에 따라 평가하였다. 치매는 신경심리검사, 정보제공자와의 면담, 병원기록, 그리고 레지스트리 자료에 근거하여 DSM-III-R 기준에 따라 진단하였다.

**결과:** 38년의 추적관찰 기간 동안, 153명의 여성에서 치매가 발생하였는데 알츠하이머병(Alzheimer disease) 치매는 104명에서 진단되었다. 중년에 신경증적 경향의 정도가 심한 것은 AD치매의 위험도가 증가하는 것과 38년에 걸쳐 오래 지속되는 스트레스와 관계가 있었다. 신경증적 경향과 AD 치매의 관계는 오래 지속되는 스트레스를 보정한 후 감소되었다. 외향성은 오래 지속되는 낮은 정도의 고통과 관계가 있었지만, AD 치매에는 영향이 없었다. 두 성격을 조합하면, 높은 신경증적 경향/낮은 외향성이 AD 치매의 위험도와 가장 관련이 깊었다.

**결론:** 이 연구는 중년의 신경증적 경향이 AD 치매의 위험도를 높이는 것과 관계가 있고, 스트레스가 이러한 관계를 중재한다는 사실을 시사한다. 이 결과는 AD 치매의 위험이 있는 여성 집단을 확인할 수 있다는 점에서 임상적인 의의가 있다.

Neurology® 2014;83:1538–1544

**Table 3** Neuroticism and extraversion in 1968 in relation to dementia and subtypes of dementia over 38 years

|                          | All-type dementia<br>(n = 153) | AD dementia<br>(n = 104) | Vascular dementia<br>(n = 35) |
|--------------------------|--------------------------------|--------------------------|-------------------------------|
| <b>Neuroticism</b>       |                                |                          |                               |
| HR <sub>1</sub> (95% CI) | 1.02 (0.99–1.06)               | 1.04 (1.00–1.08)         | 0.95 (0.88–1.03)              |
| HR <sub>2</sub> (95% CI) | 1.02 (0.98–1.06)               | 1.04 (1.00–1.08)         | 0.95 (0.88–1.04)              |
| HR <sub>3</sub> (95% CI) | 1.00 (0.96–1.04)               | 1.02 (0.97–1.07)         | 0.94 (0.86–1.03)              |
| <b>Extraversion</b>      |                                |                          |                               |
| HR <sub>1</sub> (95% CI) | 0.98 (0.93–1.03)               | 0.96 (0.90–1.01)         | 1.02 (0.92–1.13)              |
| HR <sub>2</sub> (95% CI) | 0.98 (0.94–1.03)               | 0.96 (0.90–1.02)         | 1.03 (0.92–1.14)              |
| HR <sub>3</sub> (95% CI) | 0.98 (0.93–1.04)               | 0.95 (0.90–1.02)         | 1.04 (0.93–1.16)              |

Abbreviations: AD = Alzheimer disease; CI = confidence interval; HR = hazard ratio. Cox regression analyses, presented as HRs with 95% CIs, and 1-unit increase per scale score. HR<sub>1</sub> adjusted for age; HR<sub>2</sub> adjusted for age, education, hypertension, coronary heart disease, smoking, body mass index, and depression; HR<sub>3</sub> adjusted for all variables in HR<sub>2</sub> and for long-standing distress 1968–1980.

**Table 4** Combined effect of neuroticism and extraversion in relation to AD dementia

| Neuroticism      | Extraversion      | AD dementia      |                          |                          |
|------------------|-------------------|------------------|--------------------------|--------------------------|
|                  |                   | No. of cases (%) | HR <sub>1</sub> (95% CI) | HR <sub>2</sub> (95% CI) |
| Low <sup>a</sup> | High <sup>b</sup> | 8/64 (12.5)      | 1.00 (ref.)              | 1.00 (ref.)              |
| Low              | Low               | 3/16 (18.8)      | 1.35 (0.36–5.11)         | 1.16 (0.22–6.23)         |
| High             | High              | 4/31 (12.9)      | 1.48 (0.44–4.96)         | 1.53 (0.41–5.66)         |
| High             | Low               | 16/63 (25.4)     | 2.50 (1.07–5.86)         | 1.98 (0.65–6.06)         |

Abbreviations: AD = Alzheimer disease; CI = confidence interval; HR = hazard ratio; ref. = reference.

HR<sub>1</sub> adjusted for age; HR<sub>2</sub> adjusted for age, education, hypertension, coronary heart disease, smoking, body mass index, depression, and long-standing distress 1968–1980.

<sup>a</sup>Low = the lowest quartile.

<sup>b</sup>High = the highest quartile.
